# Supplementary material for: MYC deregulates TET1 and TET2 expression to control global DNA (hydroxy)methylation and gene expression to maintain a neoplastic phenotype in T-ALL
Source: PubMed Central journal article supplement (PMC6604319; doi:10.1186/s13072-019-0278-5), 2019-07-02

**Figure S1:**

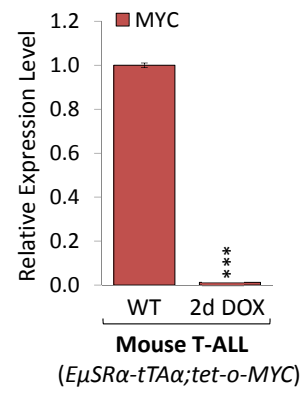

Supplement: 13072_2019_278_MOESM1_ESM.pdf [file 13072_2019_278_MOESM1_ESM.pdf]
